# Supplementary material for: Synthesis, Molecular Docking and Biological Evaluation of Glycyrrhizin Analogs as Anticancer Agents Targeting EGFR
Source: PubMed Central journal article supplement (PMC6271220; doi:10.3390/molecules19056368), 2014-05-19

# Supplementary Materials

## Content

- 1. Scheme S1 .....S1
- 2. Figure S1 .....S1
- 3. Table S1 .....S2
- 4. Copies of  $^{13}\text{C}$ -NMR spectra of all compounds .....S3–S4

Scheme S1. Synthesis of  $18\beta$ -GAMG,  $18\alpha$ -GAMG and  $18\alpha$ -GAMG.

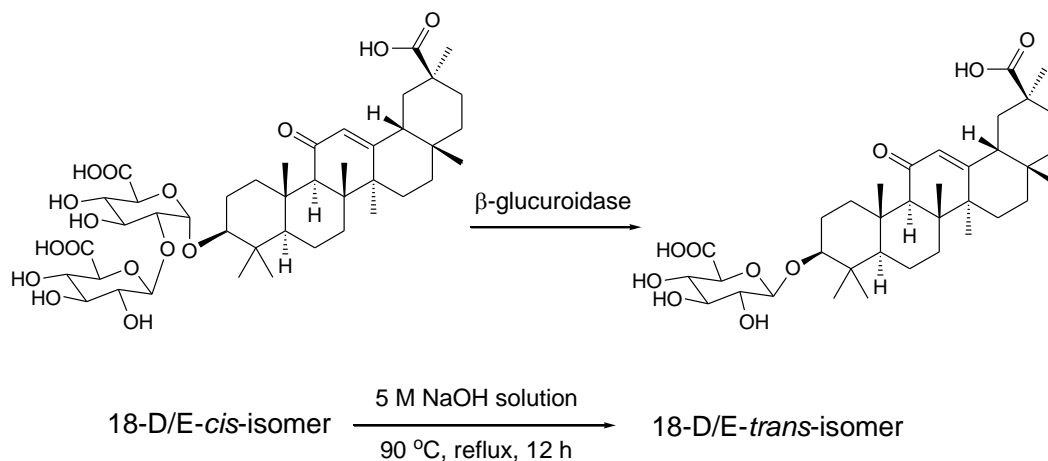

Figure S1. The isomerization reaction was monitored by  $^{13}\text{C}$ -NMR spectroscopy.

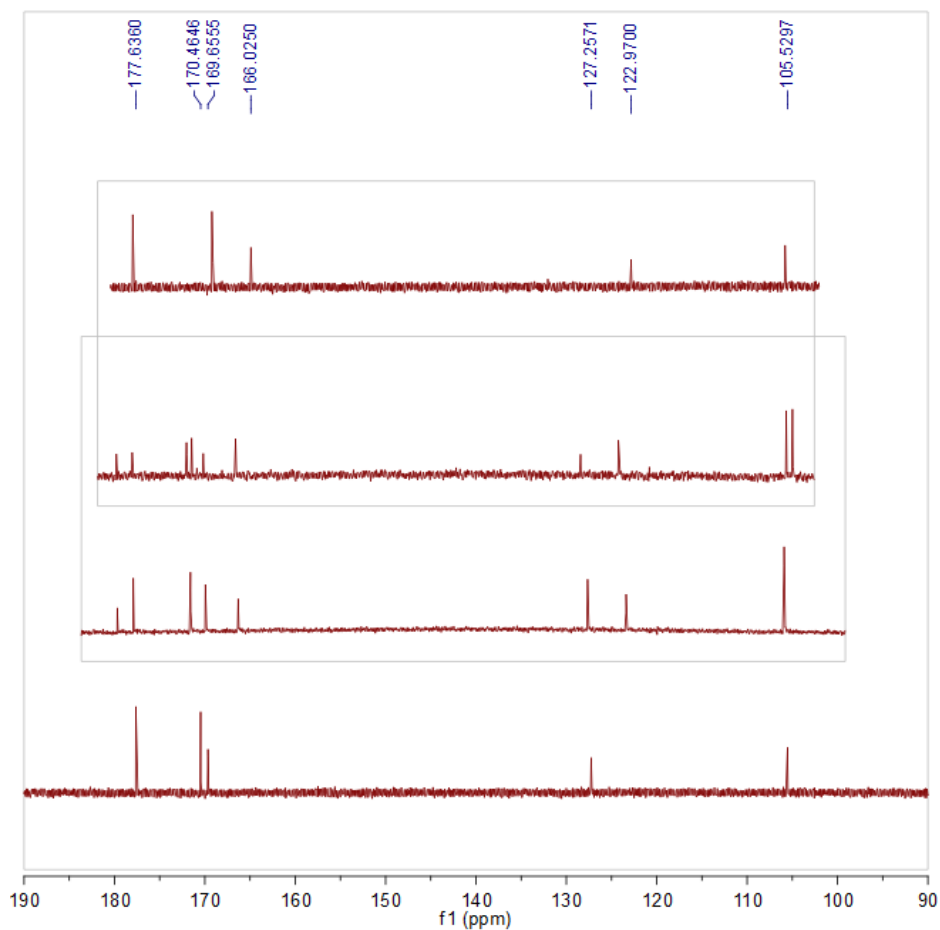

**Table S1.**  $^{13}\text{C}$ -NMR data for  $18\alpha$ -GA,  $18\alpha$ -GAMA,  $18\beta$ -GA and  $18\beta$ -GAMG in  $\text{DMSO-}d_6$  ( $\delta$ , ppm,  $J$  in Hz).

| Position        | $18\alpha$ -GA    | $18\alpha$ -GAMG  | $18\beta$ -GA     | $18\beta$ -GAMG   |
|-----------------|-------------------|-------------------|-------------------|-------------------|
| 1               | 38.6              | 38.3              | 38.7              | 38.4              |
| 2               | 25.5              | 25.7              | 25.8              | 25.6              |
| 3               | 88.3              | 87.9              | 88.3              | 87.7              |
| 4               | 39.0              | 39.1              | 39.1 <sup>a</sup> | 39.1 <sup>a</sup> |
| 5               | 54.4              | 54.3              | 54.4              | 54.1              |
| 6               | 17.1              | 17.1              | 17.0              | 16.9              |
| 7               | 33.2              | 33.2              | 32.2              | 32.1              |
| 8               | 43.4              | 43.4              | 44.9              | 44.9              |
| 9               | 59.9              | 59.9              | 61.1              | 61.0              |
| 10              | 36.2              | 36.2              | 36.4              | 36.3              |
| 11              | 198.8             | 198.7             | 199.1             | 198.9             |
| 12 <sup>*</sup> | 123.1             | 123.1             | 127.4             | 127.3             |
| 13 <sup>*</sup> | 166.2             | 166.1             | 169.8             | 169.7             |
| 14              | 44.7              | 44.7              | 43.0              | 42.9              |
| 15              | 26.3              | 26.3              | 26.1              | 26.1              |
| 16 <sup>*</sup> | 36.8              | 36.7              | 25.9              | 25.8              |
| 17 <sup>*</sup> | 35.4              | 35.3              | 31.6              | 31.5              |
| 18 <sup>*</sup> | 39.6 <sup>a</sup> | 39.8 <sup>a</sup> | 48.1              | 48.0              |
| 19 <sup>*</sup> | 31.5              | 31.4              | 40.7              | 40.6              |
| 20 <sup>*</sup> | 41.7              | 41.6              | 43.2              | 43.1              |
| 21 <sup>*</sup> | 28.5              | 28.4              | 30.4              | 30.4              |
| 22              | 35.2              | 35.1              | 37.6              | 37.5              |
| 23              | 27.3              | 27.5              | 27.2              | 27.4              |
| 24              | 16.2              | 16.45             | 16.0              | 16.2              |
| 25              | 16.4              | 16.49             | 16.3              | 16.4              |
| 26              | 18.2              | 18.2              | 18.4              | 18.3              |
| 27 <sup>*</sup> | 20.4              | 20.4              | 23.0              | 23.0              |
| 28 <sup>*</sup> | 15.7              | 15.7              | 28.5              | 28.4              |
| 29 <sup>*</sup> | 20.7              | 20.6              | 27.9              | 27.8              |
| 30              | 179.7             | 179.5             | 177.8             | 177.6             |
| 1'              | 103.5             | 105.6             | 104.8             | 105.5             |
| 2'              | 81.0              | 75.6              | 82.7              | 76.1              |
| 3'              | 74.2              | 73.7              | 76.3              | 75.6              |
| 4'              | 72.0 or 71.9      | 71.6              | 71.6 or 71.3      | 71.5              |
| 5'              | 76.6              | 76.1              | 74.9              | 73.7              |
| 6'              | 172.4             | 170.6             | 172.4             | 170.5             |
| 1''             | 103.7             |                   | 103.5             |                   |
| 2''             | 75.0              |                   | 75.7              |                   |
| 3''             | 75.2              |                   | 75.9              |                   |
| 4''             | 72.0 or 71.9      |                   | 71.6 or 71.3      |                   |
| 5''             | 76.0              |                   | 75.2              |                   |
| 6''             | 172.0             |                   | 172.0             |                   |

\* Carbon atoms of chemical shifts with significant difference; <sup>a</sup> Overlapped with solvent.

Copies of <sup>13</sup>C-NMR spectra of all compounds

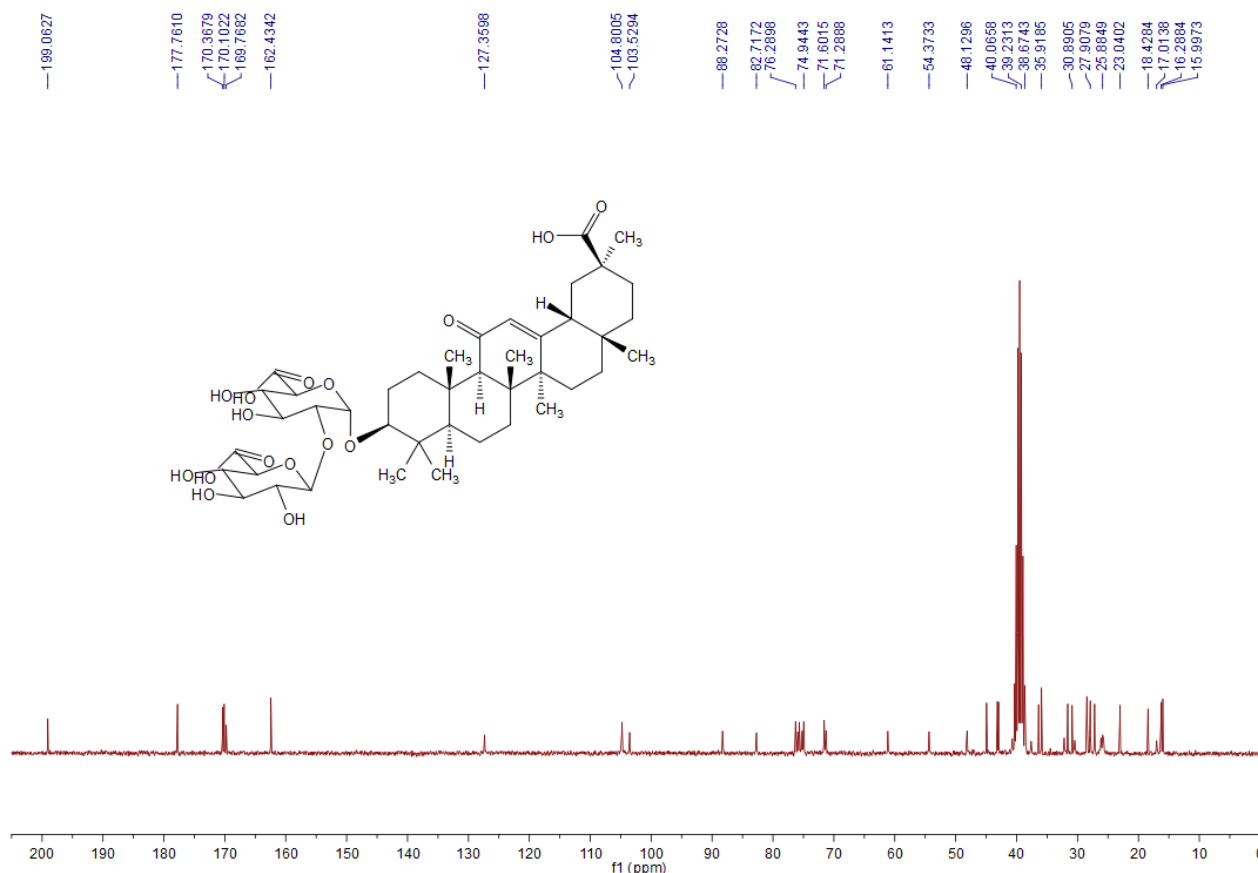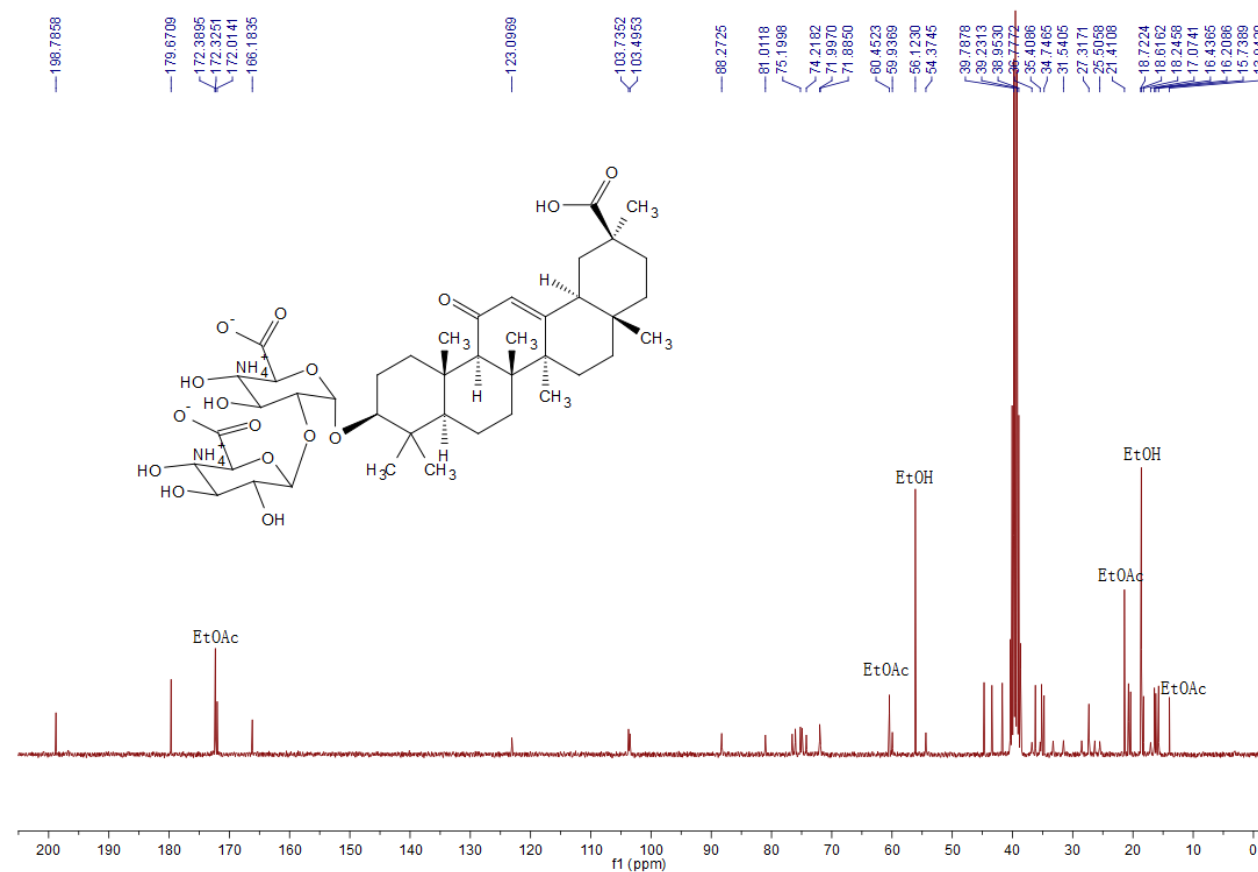

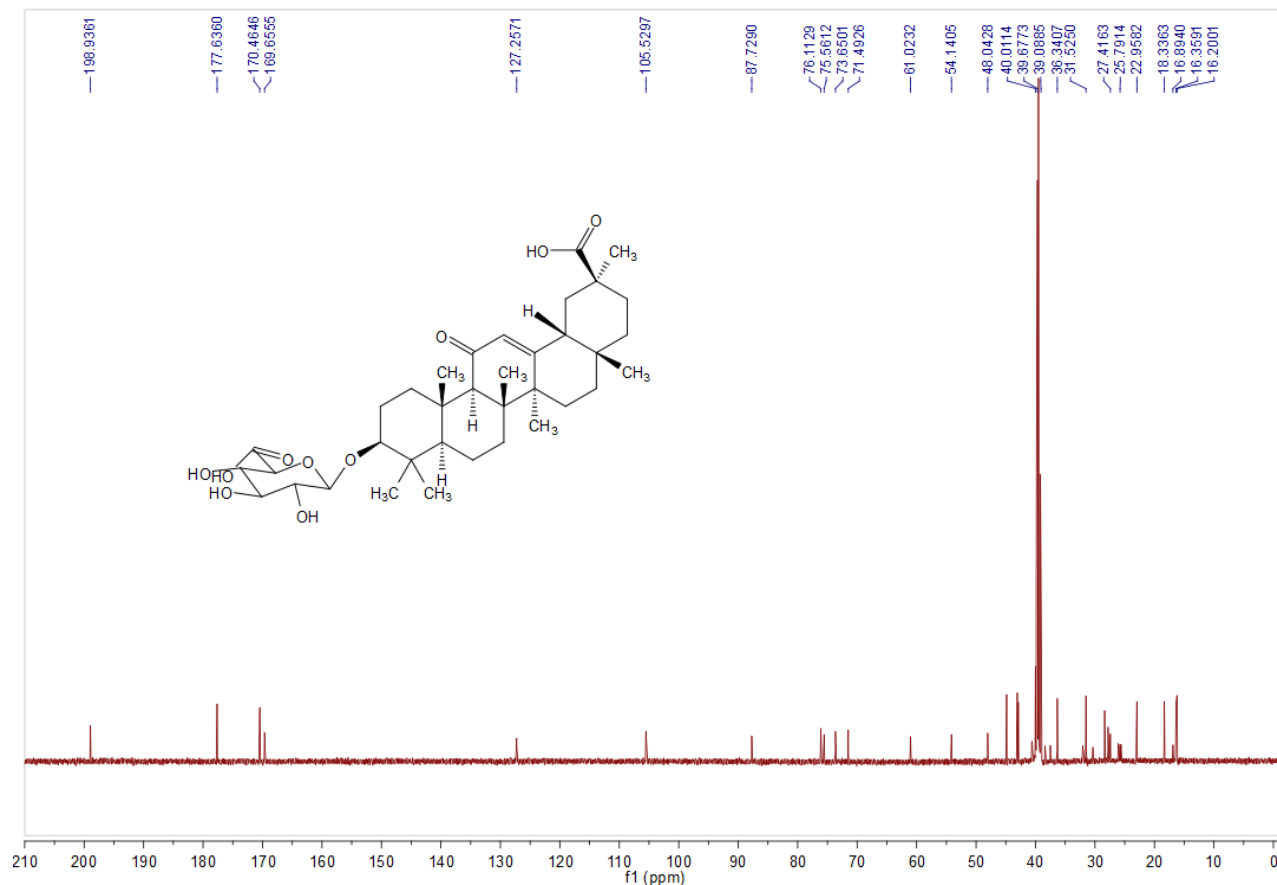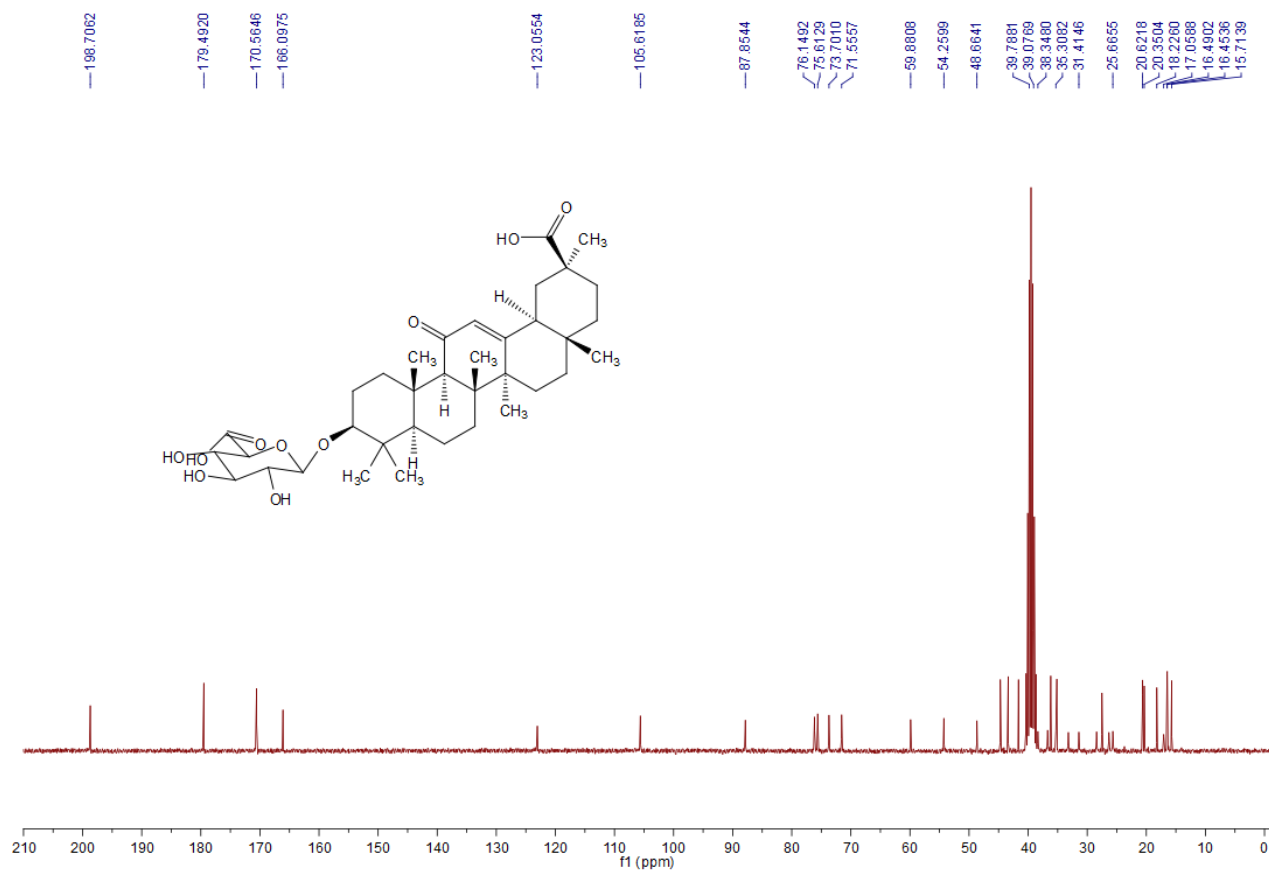

Supplement: molecules-19-06368-s001.pdf [file molecules-19-06368-s001.pdf]
